# Supplementary material for: New Genome-Wide Algorithm Identifies Novel In-Vivo Expressed Mycobacterium Tuberculosis Antigens Inducing Human T-Cell Responses with Classical and Unconventional Cytokine Profiles
Source: PubMed Central journal article supplement (PMC5125271; doi:10.1038/srep37793), 2016-11-28
Supplement: srep37793-s1.pdf [file srep37793-s1.pdf]

## Supplementary Information

### **New Genome-Wide Algorithm Identifies Novel *In-Vivo* Expressed *Mycobacterium Tuberculosis* Antigens Inducing Human T-Cell Responses with Classical and Unconventional Cytokine Profiles.**

**Mariateresa Coppola<sup>1</sup>, Krista E van Meijgaarden<sup>1</sup>, Kees LMC Franken<sup>1</sup>, Susanna  
Commandeur<sup>1,#a</sup>, Gregory Dolganov<sup>2</sup>, Igor Kramnik<sup>3</sup>, Gary K Schoolnik<sup>2</sup>, Inaki  
Comas<sup>4,5</sup>, Ole Lund<sup>6</sup>, Corine Prins<sup>1</sup>, Susan JF van den Eeden<sup>1</sup>, Gro E Korsvold<sup>7</sup>,  
Fredrik Oftung<sup>7</sup>, Annemieke Geluk<sup>1¶</sup> and Tom HM Ottenhoff<sup>1¶\*</sup>**

<sup>1</sup> *Department of Infectious Diseases, Leiden University Medical Center, Leiden, The Netherlands;* <sup>2</sup> *Department Microbiology Immunology, Stanford Univ. School of Medicine, Stanford, USA;* <sup>3</sup> *Department Immunology Infectious Diseases, Harvard School of Public Health, Boston, USA;* <sup>4</sup> *Institute of Biomedicine of Valencia (IBV-CSIC) Valencia, Spain;* <sup>5</sup> *CIBER in Epidemiology and Public Health, Madrid, Spain;* <sup>6</sup> *Dept. Systems Biology, Technical Univ. Denmark;* <sup>7</sup> *Department of Infectious Disease Immunology, Domain for Infection Control and Environmental Health, Norwegian Institute of Public Health, Oslo, Norway.*

#a: Current Address: Dept. of Medical Microbiology and Infection Control, VU University Medical Center, Amsterdam, The Netherlands

¶: These authors are joint senior authors.

\* [T.H.M.Ottenhoff@lumc.nl](mailto:T.H.M.Ottenhoff@lumc.nl)

## Supplemental Figure Legends

**Figure S1. Comparison of the functional classes of the top 15% up-regulated IVE-TB genes compared to the whole *Mtb* genome.** The pie-charts (A) indicate the proportion of each functional category (as indicated in Tuberculist) of the top 15% highly *in vivo* expressed *Mtb* (IVE-TB) genes ( $n = 194$ ) and of the whole *Mtb* genome ( $n = 4111$ ). The histogram (B) shows the ratio of the two proportions; ratios less or greater than 1 suggest the under- or over-representation of the indicated functional class in the top 15% IVE-TB genes, respectively.

**Figure S2. Immunodominance and immunogenicity of IVE-TB antigens based on cytokine production.** PBMCs of *Mtb*-responders ( $n = 9$ ) were stimulated with IVE-TB antigens and tested for the level of multiple cytokines by multiplex assay. The frequency (x-axis) and the magnitude (y-axis) of responses were ranked to compare the immunodominance and the immunogenicity for each antigen per analyte as well as for positive controls (PPD and PHA). In quadrant A are the top antigens for immunogenicity, in quadrant C the top antigens for immunodominance, and in quadrant B the top antigens for both parameters. Results were compared by Spearman's rank correlation coefficient. Graphs are shown for IL-13 and GM-CSF.

**Figure S3. Functional classes of IVE-TB antigens recognised by latently *Mtb*-infected (LTBI) individuals.** Functional categories (as described in Tuberculist) are displayed for the IVE-TB antigens able to induce (A) four, (B) three, (C) two or (D) one cytokines in LTBI donors. The functional category of the *Mtb* protein does not correlate with the type of responses observed.

**Figure S1**

**A**

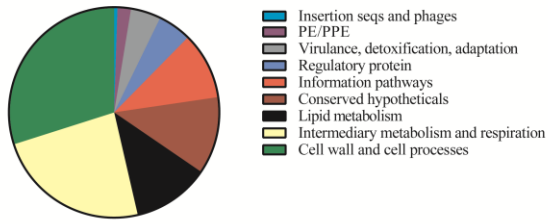

Total IVE-TB genes = 194

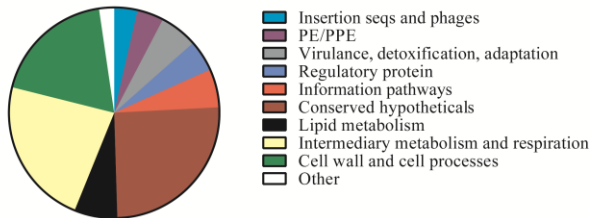

Total *Mtb* genes = 4111

**B**

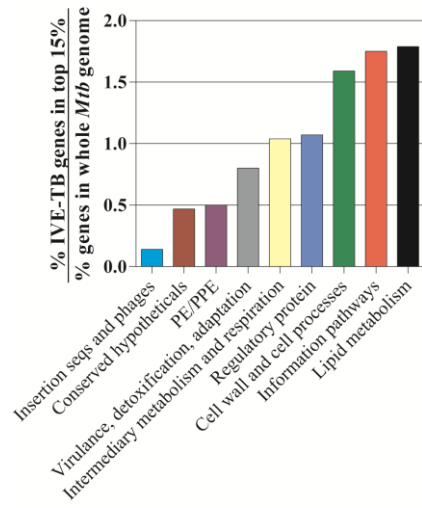

Figure S2

IL-13

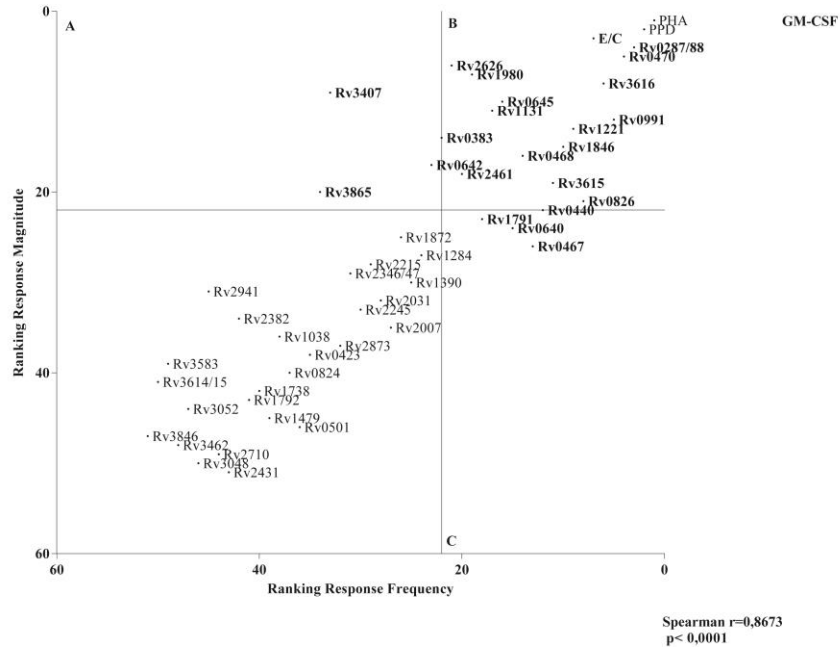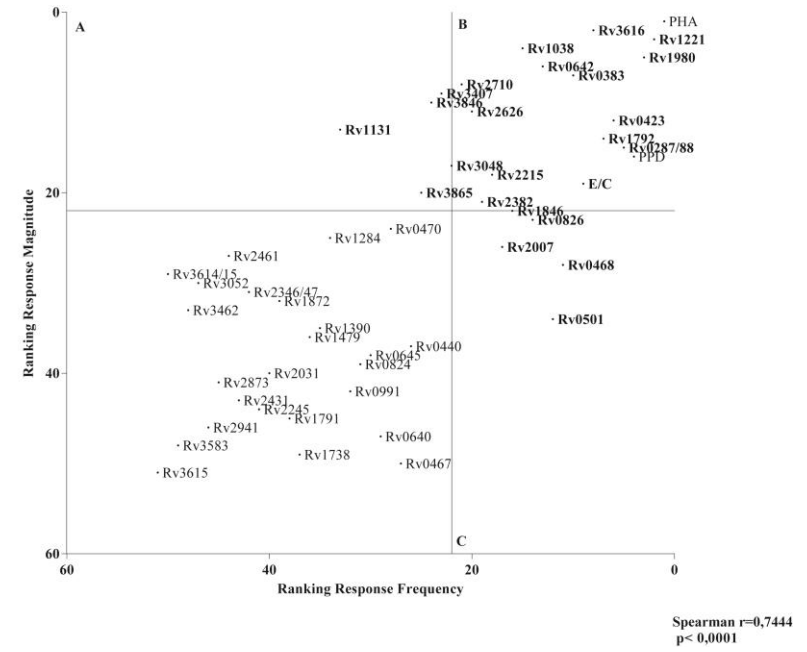

**Figure S3**

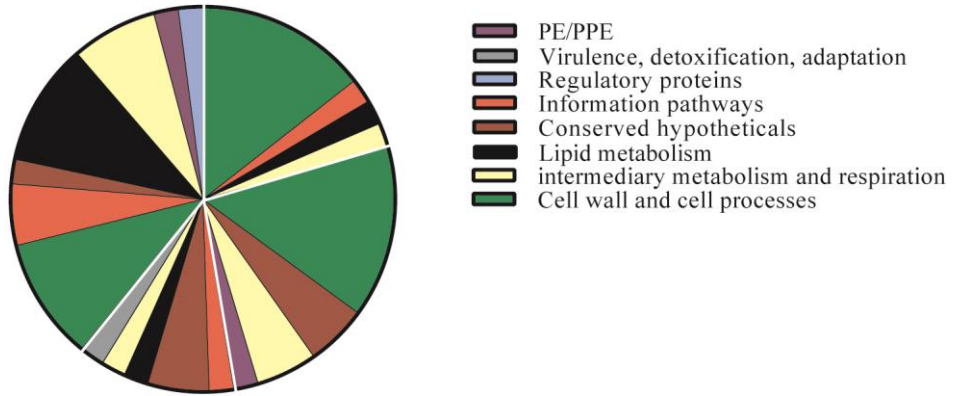

**Table S1.** *List of the 194 highly expressed in-vivo Mtb (IVE-TB) genes identified in the lung of Mtb infected mice independent of their genetic susceptibility to tuberculosis.*

| <b>H37Rv identity</b> | <b>Described (predicted) function</b>                                        |
|-----------------------|------------------------------------------------------------------------------|
| Rv0046c               | Myo-inositol-1-phosphate synthase Ino1                                       |
| Rv0065                | Possible toxin VapC1                                                         |
| Rv0066c               | Probable isocitrate dehydrogenase [NADP] Icd2 (oxalosuccinate decarboxylase) |
| Rv0103c               | Probable cation-transporter P-type ATPase B CtpB                             |
| Rv0140                | Conserved protein                                                            |
| Rv0147                | Probable aldehyde dehydrogenase (NAD <sup>+</sup> ) dependent                |
| Rv0188                | Probable conserved transmembrane protein                                     |
| Rv0206c               | Possible conserved transmembrane transport protein MmpL3                     |
| Rv0211                | iron-regulated phosphoenolpyruvate carboxykinase pckA                        |
| Rv0244c               | Probable acyl-CoA dehydrogenase FadE5                                        |
| Rv0249c               | Probable succinate dehydrogenase                                             |
| Rv0284                | ESX conserved component EccC3.                                               |
| Rv0287                | Esat-6 like protein esxG                                                     |
| Rv0288                | Low molecular weight protein antigen 7 esxH                                  |
| Rv0383c               | Possible conserved secreted protein                                          |
| Rv0423c               | Probable thiamine biosynthesis protein ThiC                                  |
| Rv0440                | 60 kDa chaperonin 2 GroEL2                                                   |
| Rv0451c               | Probable conserved membrane protein MmpS4                                    |
| Rv0453                | PPE family protein PPE11                                                     |
| Rv0467                | Isocitrate lyase Icl                                                         |
| Rv0468                | 3-hydroxybutyryl-CoA dehydrogenase FadB2                                     |
| Rv0469                | Possible mycolic acid synthase UmaA                                          |
| Rv0470c               | Mycolic acid synthase PcaA                                                   |
| Rv0474                | Probable transcriptional regulatory protein                                  |
| Rv0476                | Possible conserved transmembrane protein                                     |
| Rv0501                | Possible UDP-glucose 4-epimerase Gale2                                       |
| Rv0572c               | Hypothetical protein                                                         |
| Rv0638                | Probable preprotein translocase SecE1                                        |
| Rv0640                | 50S ribosomal protein L11 RplK                                               |
| Rv0642c               | Methoxy mycolic acid synthase 4 MmaA4                                        |
| Rv0645c               | Methoxy mycolic acid synthase 1 MmaA1                                        |
| Rv0711                | Possible arylsulfatase AtsA                                                  |
| Rv0715                | 50S ribosomal protein L24 RplX                                               |
| Rv0717                | 30S ribosomal protein S14 RpsN1                                              |
| Rv0759c               | Conserved hypothetical protein                                               |
| Rv0761c               | Possible zinc-containing alcohol dehydrogenase NAD dependent AdhB            |
| Rv0805                | Class III cyclic nucleotide phosphodiesterase                                |
| Rv0815c               | Probable thiosulfate sulfurtransferase CysA2                                 |
| Rv0824c               | Probable acyl-[acyl-carrier protein] desaturase DesA1                        |
| Rv0826                | Conserved hypothetical protein                                               |
| Rv0884c               | Possible phosphoserine aminotransferase SerC                                 |
| Rv0932c               | Periplasmic phosphate-binding lipoprotein PstS2                              |
| Rv0951                | Probable succinyl-CoA synthetase                                             |
| Rv0986                | Probable adhesion component transport ATP-binding protein ABC transporter    |
| Rv0991                | Conserved serine rich protein                                                |
| Rv1013                | Putative polyketide synthase Pks16                                           |
| Rv1037c               | Putative ESAT-6 like protein EsxI                                            |
| Rv1038c               | Esat-6 like protein esxJ                                                     |
| Rv1093                | Serine hydroxymethyltransferase 1 GlyA1                                      |
| Rv1109c               | Conserved protein                                                            |
| Rv1131                | Probable methylcitrate synthase PrpC                                         |
| Rv1156                | Conserved protein                                                            |
| Rv1174c               | Low molecular weight T-cell antigen TB8.4                                    |
| Rv1182                | Probable conserved polyketide synthase associated protein PapA3              |

|         |                                                               |
|---------|---------------------------------------------------------------|
| Rv1194c | Conserved protein                                             |
| Rv1197  | ESAT-6 like protein EsxK                                      |
| Rv1221  | Alternative RNA polymerase sigma factor sigE                  |
| Rv1248c | Multifunctional alpha-ketoglutarate metabolic enzyme          |
| Rv1270c | Possible lipoprotein LprA                                     |
| Rv1274  | Possible lipoprotein LprB                                     |
| Rv1284  | Beta-carbonic anhydrase                                       |
| Rv1286  | Probable bifunctional enzyme CysN/CysC                        |
| Rv1297  | Probable transcription termination factor Rho homolog         |
| Rv1298  | 50S ribosomal protein L31 RpmE                                |
| Rv1303  | Conserved hypothetical transmembrane protein                  |
| Rv1304  | Probable ATP synthase a chain AtpB                            |
| Rv1305  | Probable ATP synthase C chain AtpE                            |
| Rv1308  | Probable ATP synthase alpha chain AtpA                        |
| Rv1324  | Possible thioredoxin                                          |
| Rv1331  | Conserved hypothetical protein                                |
| Rv1335  | Sulfur carrier protein CysO                                   |
| Rv1388  | Putative integration host factor MihF                         |
| Rv1390  | Probable DNA-directed RNA polymerase                          |
| Rv1398  | Possible antitoxin VapB10                                     |
| Rv1404  | Probable transcriptional regulatory protein                   |
| Rv1411c | Conserved lipoprotein LprG                                    |
| Rv1419  | Unknown protein                                               |
| Rv1440  | Probable protein-export membrane protein                      |
| Rv1449c | Transketolase Tkt                                             |
| Rv1467c | Probable acyl-CoA dehydrogenase FadE15                        |
| Rv1471  | Probable thioredoxin TrxB1                                    |
| Rv1479  | Probable transcriptional regulatory protein MoxR1             |
| Rv1611  | Probable indole-3-glycerol phosphate synthase TrpC            |
| Rv1630  | 30S ribosomal protein S1 RpsA                                 |
| Rv1636  | Iron-regulated universal stress protein family protein TB15.3 |
| Rv1641  | Probable initiation factor if-3 InfC                          |
| Rv1738  | Conserved hypothetical protein                                |
| Rv1783  | ESX conserved component EccC5                                 |
| Rv1784  | Conserved hypothetical protein                                |
| Rv1791  | PE family protein PE19                                        |
| Rv1792  | ESAT-6 like protein EsxM                                      |
| Rv1793  | Putative ESAT-6 like protein EsxN                             |
| Rv1794  | Conserved protein                                             |
| Rv1795  | ESX conserved component EccD5                                 |
| Rv1805c | Hypothetical protein                                          |
| Rv1829  | Conserved protein                                             |
| Rv1831  | Hypothetical protein                                          |
| Rv1846c | Transcriptional repressor BlaI                                |
| Rv1854c | Probable NADH dehydrogenase Ndh                               |
| Rv1872c | Possible L-lactate dehydrogenase                              |
| Rv1876  | Probable bacterioferritin BfrA                                |
| Rv1880c | Probable cytochrome P450 140 Cyp140                           |
| Rv1888c | Possible transmembrane protein                                |
| Rv1909c | Ferric uptake regulation protein FurA                         |
| Rv1915  | Probable isocitrate lyase AceAa                               |
| Rv1925  | Probable acyl-CoA ligase FadD31                               |
| Rv1980c | Immunogenic protein Mpt64                                     |
| Rv1981c | Ribonucleoside-diphosphate reductase                          |
| Rv1984c | Probable cutinase precursor CFP21                             |
| Rv2007  | Ferredoxin fdxA                                               |
| Rv2031  | Heat shock protein hspX                                       |
| Rv2091c | Probable membrane protein                                     |
| Rv2108  | PPE family protein PPE36                                      |
| Rv2115c | Mycobacterial proteasome ATPase Mpa                           |

Rv2193 Probable cytochrome C oxidase (subunit III) CtaE  
Rv2194 Probable ubiquinol-cytochrome C reductase QcrC  
Rv2215 DlaT, dihydrolipoamide acyltransferase, E2 component of pyruvate dehydrogenase  
Rv2219 Probable conserved transmembrane protein  
Rv2245 3-oxoacyl-[acyl-carrier protein] synthase 1 KasA  
Rv2334 Cysteine synthase a CysK1  
Rv2346c Putative ESAT-6 like protein EsxO  
Rv2347c Putative ESAT-6 like protein EsxP  
Rv2382 Polyketide synthetase mbtC  
Rv2389c Probable resuscitation-promoting factor RpfD  
Rv2428 Alkyl hydroperoxide reductase C protein AhpC  
Rv2431c PE family protein PE25  
Rv2455c Probable oxidoreductase  
Rv2457c Probable ATP-dependent CLP protease ATP-binding subunit ClpX  
Rv2460c Probable ATP-dependent CLP protease proteolytic subunit 2 ClpP2  
Rv2461c Probable ATP-dependent CLP protease proteolytic subunit 1 ClpP1  
Rv2582 Probable peptidyl-prolyl cis-trans isomerase B PpiB  
Rv2617c Probable transmembrane protein  
Rv2626 Hypoxic response protein 1 Hrp1  
Rv2657c Probable PhiRv2 prophage protein  
Rv2663 Hypothetical protein  
Rv2699c Conserved hypothetical protein  
Rv2710 RNA polymerase sigma factor sigB  
Rv2716 Conserved protein  
Rv2873 Cell surface lipoprotein Mpt83  
Rv2875 Major secreted immunogenic protein Mpt70  
Rv2876 Possible conserved transmembrane protein  
Rv2878c Soluble secreted antigen Mpt53 precursor  
Rv2882c Ribosome recycling factor Frr  
Rv2890c 30S ribosomal protein S2 RpsB  
Rv2931 Phenolphthiocerol synthesis type-I polyketide synthase PpsA  
Rv2932 Phenolphthiocerol synthesis type-I polyketide synthase PpsB  
Rv2934 Phenolphthiocerol synthesis type-I polyketide synthase PpsD  
Rv2935 Phenolphthiocerol synthesis type-I polyketide synthase PpsE  
Rv2936 Daunorubicin-dim-transport ATP-binding protein ABC transporter DrrA  
Rv2939 Possible conserved polyketide synthase associated protein PapA5  
Rv2941 Fatty-acid-AMP ligase FadD28  
Rv3048c Ribonucleoside-diphosphate reductase  
Rv3051c Ribonucleoside-diphosphate reductase NrdE (R1F protein)  
Rv3052 hypothetical protein nrdI  
Rv3141 Probable NADPH quinone oxidoreductase FadB4  
Rv3193c Probable conserved transmembrane protein  
Rv3213c Possible SOJ/para-related protein  
Rv3219 Transcriptional regulator whib-like whiB1  
Rv3246c Two component sensory transduction transcriptional regulatory protein MtrA  
Rv3248c Probable adenosylhomocysteinase SahH  
Rv3280 Probable propionyl-CoA carboxylase beta chain 5 AccD5  
Rv3407 Possible antitoxin VapB47  
Rv3416 Transcriptional regulatory protein WhiB-like WhiB3  
Rv3418c 10 kDa chaperonin GroES  
Rv3460c 30S ribosomal protein S13 RpsM  
Rv3462 Translation initiation factor IF-1 infA  
Rv3528c Unknown protein  
Rv3583c Possible transcription factor  
Rv3596c Probable ATP-dependent protease ATP-binding subunit ClpC1  
Rv3601c Probable aspartate 1-decarboxylase precursor PanD  
Rv3614c ESX-1 secretion-associated protein EspD  
Rv3615 ESX-1 secretion-associated protein EspC  
Rv3616 Conserved alanine and glycine rich protein  
Rv3619c Putative ESAT-6 like protein EsxV



|         |                                                                                  |
|---------|----------------------------------------------------------------------------------|
| Rv3620c | Putative ESAT-6 like protein EsxW                                                |
| Rv3667  | Acetyl-coenzyme A synthetase Acs                                                 |
| Rv3681c | Probable transcriptional regulatory protein WhiB-like WhiB4                      |
| Rv3682  | Probable bifunctional membrane-associated penicillin-binding protein 1A/1B PonA2 |
| Rv3824c | Conserved polyketide synthase associated protein PapA1                           |
| Rv3841  | Bacterioferritin BfrB                                                            |
| Rv3846  | Superoxide dismutase sodA                                                        |
| Rv3854c | Monooxygenase EthA                                                               |
| Rv3857c | Possible membrane protein                                                        |
| Rv3858c | Probable NADH-dependent glutamate synthase                                       |
| Rv3863  | Unknown alanine rich protein                                                     |
| Rv3864  | ESX-1 secretion-associated protein EspE                                          |
| Rv3865  | ESX-1 secretion-associated protein EspF                                          |
| Rv3874  | 10 kDa culture filtrate antigen EsxB (LHP) (CFP10)                               |
| Rv3875  | 6 kDa early secretory antigenic target esxA                                      |
| Rv3878  | ESX-1 secretion-associated protein EspJ                                          |
| Rv3879c | ESX-1 secretion-associated protein EspK                                          |
| Rv3881c | Secreted ESX-1 substrate protein B, EspB                                         |
| Rv3890c | ESAT-6 like protein EsxC                                                         |
| Rv3914  | Thioredoxin trxC                                                                 |

**Table S2.** Conservation and number of predicted HLA class-Ia and -II binding peptides of 194 IVE-TB genes.

| Genes   | Aminoacid (aa) change |                   | Ratio N/S | Protein length | Aa conservation (%) | NB HLA class Ia | NB HLA class II |
|---------|-----------------------|-------------------|-----------|----------------|---------------------|-----------------|-----------------|
|         | Synonymous (S)        | Nonsynonymous (N) |           |                |                     |                 |                 |
| Rv0046c | 3                     | 5                 | 1.67      | 367            | 99                  | 68              | 2270            |
| Rv0065  | 2                     | 3                 | 1.50      | 133            | 98                  | 45              | 998             |
| Rv0066c | 7                     | 12                | 1.71      | 745            | 98                  | 186             | 4940            |
| Rv0103c | 8                     | 11                | 1.38      | 752            | 99                  | 205             | 5666            |
| Rv0140  | 1                     | 4                 | 4.00      | 126            | 97                  | 38              | 579             |
| Rv0147  | 5                     | 12                | 2.40      | 506            | 98                  | 140             | 3800            |
| Rv0188  | 5                     | 0                 | 0.00      | 143            | 100                 | 57              | 1213            |
| Rv0206c | 11                    | 17                | 1.55      | 944            | 98                  | 292             | 7097            |
| Rv0211  | 7                     | 11                | 1.57      | 606            | 98                  | 133             | 2869            |
| Rv0244c | 6                     | 17                | 2.83      | 611            | 97                  | 148             | 4594            |
| Rv0249c | 3                     | 3                 | 1.00      | 273            | 99                  | 104             | 2810            |
| Rv0284  | 17                    | 17                | 1.00      | 1330           | 99                  | 347             | 9270            |
| Rv0287  | 0                     | 1                 | NA        | 97             | 99                  | 25              | 813             |
| Rv0288  | 1                     | 6                 | 6.00      | 96             | 94                  | 26              | 609             |
| Rv0383c | 2                     | 3                 | 1.50      | 284            | 99                  | 62              | 1613            |
| Rv0423c | 4                     | 4                 | 1.00      | 547            | 99                  | 118             | 3113            |
| Rv0440  | 12                    | 0                 | 0.00      | 540            | 100                 | 92              | 2733            |
| Rv0451c | 3                     | 1                 | 0.33      | 140            | 99                  | 34              | 511             |
| Rv0453  | 0                     | 0                 | NA        | 518            | 100                 | 135             | 3249            |
| Rv0467  | 7                     | 1                 | 0.14      | 428            | 100                 | 100             | 2399            |
| Rv0468  | 4                     | 7                 | 1.75      | 286            | 98                  | 60              | 2055            |
| Rv0469  | 3                     | 10                | 3.33      | 286            | 97                  | 84              | 2519            |
| Rv0470c | 2                     | 3                 | 1.50      | 287            | 99                  | 76              | 2252            |
| Rv0474  | 5                     | 2                 | 0.40      | 140            | 99                  | 20              | 821             |
| Rv0476  | 0                     | 0                 | NA        | 87             | 100                 | 33              | 717             |
| Rv0501  | 2                     | 6                 | 3.00      | 376            | 98                  | 88              | 2816            |
| Rv0572c | 1                     | 4                 | 4.00      | 113            | 96                  | 23              | 522             |
| Rv0638  | 0                     | 2                 | NA        | 161            | 99                  | 43              | 888             |
| Rv0640  | 1                     | 1                 | 1.00      | 142            | 99                  | 22              | 782             |
| Rv0642c | 5                     | 4                 | 0.80      | 301            | 99                  | 71              | 1805            |
| Rv0645c | 5                     | 2                 | 0.40      | 286            | 99                  | 80              | 2479            |
| Rv0711  | 9                     | 10                | 1.11      | 787            | 99                  | 177             | 4322            |
| Rv0715  | 3                     | 0                 | 0.00      | 105            | 100                 | 12              | 348             |
| Rv0717  | 0                     | 2                 | NA        | 61             | 97                  | 13              | 394             |
| Rv0759c | 1                     | 1                 | 1.00      | 110            | 99                  | 31              | 807             |
| Rv0761c | 2                     | 2                 | 1.00      | 375            | 99                  | 71              | 1961            |
| Rv0805  | 3                     | 7                 | 2.33      | 318            | 98                  | 66              | 2057            |
| Rv0815c | 2                     | 0                 | 0.00      | 277            | 100                 | 49              | 1238            |
| Rv0824c | 3                     | 3                 | 1.00      | 338            | 99                  | 77              | 2160            |
| Rv0826  | 1                     | 7                 | 7.00      | 351            | 98                  | 89              | 2172            |
| Rv0884c | 3                     | 4                 | 1.33      | 376            | 99                  | 94              | 2195            |
| Rv0932c | 4                     | 9                 | 2.25      | 370            | 98                  | 68              | 1481            |
| Rv0951  | 3                     | 5                 | 1.67      | 387            | 99                  | 72              | 2305            |
| Rv0986  | 2                     | 4                 | 2.00      | 248            | 98                  | 57              | 1533            |
| Rv0991  | 1                     | 0                 | 0.00      | 110            | 100                 | 14              | 387             |
| Rv1013  | 2                     | 0                 | 0.00      | 544            | 100                 | 136             | 3600            |
| Rv1037c | 1                     | 0                 | 0.00      | 94             | 100                 | 11              | 475             |
| Rv1038c | 1                     | 1                 | 1.00      | 98             | 99                  | 17              | 468             |
| Rv1093  | 4                     | 3                 | 0.75      | 426            | 99                  | 96              | 2870            |
| Rv1109c | 1                     | 6                 | 6.00      | 212            | 97                  | 50              | 1445            |
| Rv1131  | 6                     | 7                 | 1.17      | 393            | 98                  | 121             | 2960            |
| Rv1156  | 3                     | 4                 | 1.33      | 195            | 98                  | 43              | 1288            |
| Rv1174c | 0                     | 2                 | NA        | 110            | 98                  | 20              | 708             |
| Rv1182  | 5                     | 4                 | 0.80      | 472            | 99                  | 118             | 2787            |
| Rv1194c | 3                     | 8                 | 2.67      | 421            | 98                  | 96              | 3016            |
| Rv1197  | 1                     | 1                 | 1.00      | 98             | 99                  | 17              | 477             |
| Rv1221  | 2                     | 4                 | 2.00      | 257            | 98                  | 58              | 1546            |
| Rv1248c | 15                    | 8                 | 0.53      | 1231           | 99                  | 261             | 8749            |
| Rv1270c | 3                     | 5                 | 1.67      | 244            | 98                  | 36              | 1183            |
| Rv1274  | 0                     | 1                 | NA        | 185            | 99                  | 36              | 745             |
| Rv1284  | 4                     | 1                 | 0.25      | 163            | 99                  | 32              | 1026            |
| Rv1286  | 7                     | 8                 | 1.14      | 614            | 99                  | 129             | 3980            |
| Rv1297  | 2                     | 7                 | 3.50      | 602            | 99                  | 95              | 2856            |
| Rv1298  | 1                     | 1                 | 1.00      | 80             | 99                  | 6               | 149             |
| Rv1303  | 1                     | 1                 | 1.00      | 161            | 99                  | 55              | 1599            |

| Genes   | Aminoacid (aa) change |                   | Ratio N/S | Protein length | Aa conservation (%) | NB HLA class Ia | NB HLA class II |
|---------|-----------------------|-------------------|-----------|----------------|---------------------|-----------------|-----------------|
|         | Synonymous (S)        | Nonsynonymous (N) |           |                |                     |                 |                 |
| Rv1304  | 3                     | 3                 | 1,00      | 250            | 99                  | 114             | 2804            |
| Rv1305  | 2                     | 0                 | 0,00      | 81             | 100                 | 25              | 481             |
| Rv1308  | 2                     | 5                 | 2,50      | 549            | 99                  | 119             | 2799            |
| Rv1324  | 3                     | 4                 | 1,33      | 304            | 99                  | 65              | 1971            |
| Rv1331  | 1                     | 1                 | 1,00      | 101            | 99                  | 25              | 513             |
| Rv1335  | 1                     | 1                 | 1,00      | 93             | 99                  | 16              | 371             |
| Rv1388  | 1                     | 1                 | 1,00      | 190            | 99                  | 33              | 756             |
| Rv1390  | 0                     | 0                 | NA        | 110            | 100                 | 30              | 546             |
| Rv1398  | 1                     | 1                 | 1,00      | 85             | 99                  | 9               | 418             |
| Rv1404  | 3                     | 3                 | 1,00      | 160            | 98                  | 39              | 1285            |
| Rv1411c | 2                     | 1                 | 0,50      | 236            | 100                 | 36              | 1101            |
| Rv1419  | 2                     | 3                 | 1,50      | 157            | 98                  | 23              | 441             |
| Rv1440  | 0                     | 2                 | NA        | 77             | 97                  | 22              | 414             |
| Rv1449c | 4                     | 7                 | 1,75      | 700            | 99                  | 157             | 4241            |
| Rv1467c | 2                     | 10                | 5,00      | 609            | 98                  | 141             | 4331            |
| Rv1471  | 0                     | 0                 | NA        | 123            | 100                 | 22              | 788             |
| Rv1479  | 2                     | 4                 | 2,00      | 377            | 99                  | 93              | 3078            |
| Rv1611  | 1                     | 3                 | 3,00      | 272            | 99                  | 53              | 1417            |
| Rv1630  | 4                     | 4                 | 1,00      | 481            | 99                  | 74              | 2076            |
| Rv1636  | 1                     | 3                 | 3,00      | 146            | 98                  | 20              | 689             |
| Rv1641  | 2                     | 2                 | 1,00      | 201            | 99                  | 24              | 1015            |
| Rv1738  | 1                     | 1                 | 1,00      | 94             | 99                  | 14              | 439             |
| Rv1783  | 3                     | 3                 | 1,00      | 435            | 99                  | 120             | 2812            |
| Rv1784  | 13                    | 11                | 0,85      | 932            | 99                  | 226             | 6678            |
| Rv1791  | 0                     | 0                 | NA        | 99             | 100                 | 28              | 761             |
| Rv1792  | 0                     | 0                 | NA        | 98             | 100                 | 17              | 484             |
| Rv1793  | 4                     | 1                 | 0,25      | 94             | 99                  | 12              | 549             |
| Rv1794  | 4                     | 1                 | 0,25      | 300            | 100                 | 70              | 1766            |
| Rv1795  | 3                     | 4                 | 1,33      | 503            | 99                  | 179             | 4687            |
| Rv1805c | 1                     | 2                 | 2,00      | 115            | 98                  | 25              | 401             |
| Rv1829  | 3                     | 2                 | 0,67      | 164            | 99                  | 31              | 1049            |
| Rv1831  | 0                     | 0                 | NA        | 85             | 100                 | 12              | 446             |
| Rv1846c | 3                     | 4                 | 1,33      | 138            | 97                  | 30              | 784             |
| Rv1854c | 7                     | 5                 | 0,71      | 463            | 99                  | 110             | 3358            |
| Rv1872c | 5                     | 14                | 2,80      | 414            | 97                  | 98              | 3068            |
| Rv1876  | 0                     | 3                 | NA        | 159            | 98                  | 30              | 1187            |
| Rv1880c | 8                     | 7                 | 0,88      | 438            | 98                  | 93              | 3192            |
| Rv1888c | 2                     | 2                 | 1,00      | 186            | 99                  | 116             | 1964            |
| Rv1909c | 0                     | 5                 | NA        | 150            | 97                  | 32              | 817             |
| Rv1915  | 3                     | 8                 | 2,67      | 367            | 98                  | 86              | 2688            |
| Rv1925  | 3                     | 6                 | 2,00      | 620            | 99                  | 149             | 4268            |
| Rv1980c | 3                     | 2                 | 0,67      | 228            | 99                  | 43              | 1106            |
| Rv1981c | 1                     | 1                 | 1,00      | 322            | 100                 | 90              | 2198            |
| Rv1984c | 1                     | 2                 | 2,00      | 217            | 99                  | 40              | 970             |
| Rv2007  | 0                     | 1                 | NA        | 114            | 99                  | 14              | 389             |
| Rv2031  | 4                     | 2                 | 0,50      | 144            | 99                  | 25              | 694             |
| Rv2091c | 5                     | 2                 | 0,40      | 244            | 99                  | 32              | 477             |
| Rv2108  | 0                     | 0                 | NA        | 243            | 100                 | 60              | 1549            |
| Rv2115c | 7                     | 4                 | 0,57      | 609            | 99                  | 114             | 3396            |
| Rv2193  | 1                     | 2                 | 2,00      | 203            | 99                  | 123             | 2010            |
| Rv2194  | 2                     | 6                 | 3,00      | 280            | 98                  | 68              | 1165            |
| Rv2215  | 5                     | 10                | 2,00      | 553            | 98                  | 96              | 2239            |
| Rv2219  | 3                     | 8                 | 2,67      | 250            | 97                  | 61              | 1548            |
| Rv2245  | 4                     | 7                 | 1,75      | 416            | 98                  | 93              | 2163            |
| Rv2334  | 4                     | 5                 | 1,25      | 310            | 98                  | 68              | 1839            |
| Rv2346c | 2                     | 1                 | 0,50      | 94             | 99                  | 13              | 540             |
| Rv2347c | 1                     | 0                 | 0,00      | 98             | 100                 | 19              | 479             |
| Rv2382  | 5                     | 1                 | 0,20      | 444            | 100                 | 89              | 2567            |
| Rv2389c | 3                     | 0                 | 0,00      | 154            | 100                 | 20              | 625             |
| Rv2428  | 5                     | 1                 | 0,20      | 195            | 99                  | 37              | 972             |
| Rv2431c | 0                     | 0                 | NA        | 99             | 100                 | 31              | 807             |
| Rv2455c | 5                     | 9                 | 1,80      | 653            | 99                  | 159             | 3863            |
| Rv2457c | 11                    | 5                 | 0,45      | 426            | 99                  | 96              | 2618            |
| Rv2460c | 1                     | 1                 | 1,00      | 214            | 100                 | 52              | 1681            |
| Rv2461c | 4                     | 1                 | 0,25      | 200            | 100                 | 62              | 1624            |

| Genes   | Aminoacid (aa) change |                   | Ratio N/S | Protein length | Aa conservation (%) | NB HLA class Ia | NB HLA class II |
|---------|-----------------------|-------------------|-----------|----------------|---------------------|-----------------|-----------------|
|         | Synonymous (S)        | Nonsynonymous (N) |           |                |                     |                 |                 |
| Rv2582  | 3                     | 3                 | 1,00      | 308            | 99                  | 59              | 1482            |
| Rv2617c | 1                     | 3                 | 3,00      | 146            | 98                  | 47              | 1358            |
| Rv2626  | 1                     | 2                 | 2,00      | 143            | 99                  | 36              | 787             |
| Rv2657c | 0                     | 0                 | NA        | 86             | 100                 | 22              | 524             |
| Rv2663  | 0                     | 2                 | NA        | 77             | 97                  | 27              | 496             |
| Rv2699c | 0                     | 2                 | NA        | 100            | 98                  | 15              | 296             |
| Rv2710  | 3                     | 1                 | 0,33      | 323            | 100                 | 58              | 2109            |
| Rv2716  | 1                     | 2                 | 2,00      | 228            | 99                  | 42              | 1073            |
| Rv2873  | 3                     | 3                 | 1,00      | 220            | 99                  | 42              | 1102            |
| Rv2875  | 2                     | 3                 | 1,50      | 193            | 98                  | 42              | 1072            |
| Rv2876  | 2                     | 4                 | 2,00      | 104            | 96                  | 30              | 619             |
| Rv2878c | 1                     | 4                 | 4,00      | 173            | 98                  | 51              | 1191            |
| Rv2882c | 4                     | 4                 | 1,00      | 185            | 98                  | 27              | 916             |
| Rv2890c | 3                     | 1                 | 0,33      | 287            | 100                 | 59              | 1680            |
| Rv2931  | 15                    | 25                | 1,67      | 1876           | 99                  | 393             | 11518           |
| Rv2932  | 16                    | 7                 | 0,44      | 1538           | 100                 | 356             | 10367           |
| Rv2934  | 8                     | 23                | 2,88      | 1827           | 99                  | 407             | 11483           |
| Rv2935  | 13                    | 20                | 1,54      | 1488           | 99                  | 373             | 9629            |
| Rv2936  | 2                     | 6                 | 3,00      | 331            | 98                  | 78              | 2239            |
| Rv2939  | 3                     | 7                 | 2,33      | 422            | 98                  | 115             | 3127            |
| Rv2941  | 11                    | 6                 | 0,55      | 580            | 99                  | 135             | 3925            |
| Rv3048c | 3                     | 0                 | 0,00      | 324            | 100                 | 105             | 2332            |
| Rv3051c | 4                     | 6                 | 1,50      | 693            | 99                  | 188             | 5119            |
| Rv3052  | 0                     | 0                 | NA        | 150            | 100                 | 40              | 874             |
| Rv3141  | 2                     | 5                 | 2,50      | 323            | 98                  | 64              | 1869            |
| Rv3193c | 13                    | 12                | 0,92      | 992            | 99                  | 282             | 7902            |
| Rv3213c | 4                     | 7                 | 1,75      | 266            | 97                  | 61              | 1907            |
| Rv3219  | 1                     | 0                 | 0,00      | 84             | 100                 | 12              | 150             |
| Rv3246c | 1                     | 2                 | 2,00      | 228            | 99                  | 47              | 1480            |
| Rv3248c | 8                     | 7                 | 0,88      | 495            | 99                  | 87              | 2728            |
| Rv3280  | 6                     | 4                 | 0,67      | 548            | 99                  | 119             | 3349            |
| Rv3407  | 0                     | 1                 | NA        | 99             | 99                  | 22              | 534             |
| Rv3416  | 0                     | 3                 | NA        | 102            | 97                  | 24              | 214             |
| Rv3418c | 1                     | 0                 | 0,00      | 100            | 100                 | 16              | 279             |
| Rv3460c | 2                     | 2                 | 1,00      | 124            | 98                  | 22              | 519             |
| Rv3462  | 3                     | 0                 | 0,00      | 73             | 100                 | 16              | 556             |
| Rv3528c | 4                     | 4                 | 1,00      | 237            | 98                  | 53              | 1555            |
| Rv3583c | 0                     | 0                 | NA        | 162            | 100                 | 30              | 800             |
| Rv3596c | 9                     | 6                 | 0,67      | 848            | 99                  | 184             | 5124            |
| Rv3601c | 3                     | 1                 | 0,33      | 139            | 99                  | 22              | 750             |
| Rv3614c | 3                     | 5                 | 1,67      | 184            | 97                  | 42              | 860             |
| Rv3615  | 2                     | 2                 | 1,00      | 103            | 98                  | 15              | 543             |
| Rv3616  | 4                     | 9                 | 2,25      | 392            | 98                  | 82              | 2583            |
| Rv3619c | 0                     | 0                 | NA        | 94             | 100                 | 11              | 475             |
| Rv3620c | 0                     | 2                 | NA        | 98             | 98                  | 17              | 468             |
| Rv3667  | 7                     | 13                | 1,86      | 651            | 98                  | 152             | 3698            |
| Rv3681c | 1                     | 5                 | 5,00      | 118            | 96                  | 28              | 457             |
| Rv3682  | 10                    | 8                 | 0,80      | 810            | 99                  | 165             | 4239            |
| Rv3824c | 9                     | 9                 | 1,00      | 511            | 98                  | 122             | 3436            |
| Rv3841  | 3                     | 3                 | 1,00      | 181            | 98                  | 46              | 1297            |
| Rv3846  | 3                     | 4                 | 1,33      | 207            | 98                  | 52              | 1581            |
| Rv3854c | 10                    | 11                | 1,10      | 489            | 98                  | 138             | 3412            |
| Rv3857c | 1                     | 0                 | 0,00      | 65             | 100                 | 13              | 366             |
| Rv3858c | 7                     | 3                 | 0,43      | 488            | 99                  | 88              | 1965            |
| Rv3863  | 5                     | 11                | 2,20      | 392            | 97                  | 62              | 2023            |
| Rv3864  | 2                     | 5                 | 2,50      | 402            | 99                  | 78              | 2436            |
| Rv3865  | 0                     | 3                 | NA        | 103            | 97                  | 22              | 558             |
| Rv3874  | 0                     | 2                 | NA        | 100            | 98                  | 11              | 288             |
| Rv3875  | 2                     | 1                 | 0,50      | 95             | 99                  | 8               | 341             |
| Rv3878  | 0                     | 7                 | NA        | 280            | 98                  | 34              | 963             |
| Rv3879c | 12                    | 17                | 1,42      | 729            | 98                  | 133             | 2916            |
| Rv3881c | 4                     | 19                | 4,75      | 460            | 96                  | 81              | 1493            |
| Rv3890c | 1                     | 0                 | 0,00      | 95             | 100                 | 16              | 377             |
| Rv3914  | 1                     | 4                 | 4,00      | 116            | 97                  | 30              | 601             |

Aa changes were determined in 219 whole-genome sequenced Mtb complex strains<sup>83</sup>; NB: number of peptides predicted to bind to 12 HLA class Ia supertype representatives<sup>31</sup> and to 29 HLA class II molecules<sup>34</sup>. Binding peptides are identified based on % Rank as described in [cbs.dtu.dk/services/NetMHCcons](https://cbs.dtu.dk/services/NetMHCcons)<sup>31</sup> and [cbs.dtu.dk/services/NetMHCIIpan](https://cbs.dtu.dk/services/NetMHCIIpan)<sup>32</sup> servers.

**Table S3.** Aminoacid homology of the *in vitro* tested IVE-TB antigens with BCG and other pathogenic mycobacteria.

| Rv number | Amino acid homology (%) |                               |                                 |                                 |
|-----------|-------------------------|-------------------------------|---------------------------------|---------------------------------|
|           | BCG (taxid:33892)       | <i>M. leprae</i> (taxid:1769) | <i>M. ulcerans</i> (taxid:1809) | <i>M. kansasii</i> (taxid:1768) |
| Rv3875    | 26%                     | 64%                           | 96%                             | 99%                             |
| Rv3874    | 27%                     | 16%                           | 98%                             | 97%                             |
| Rv0287    | 100%                    | 84%                           | 97%                             | 96%                             |
| Rv0288    | 100%                    | 85%                           | 94%                             | 95%                             |
| Rv0383    | 100%                    | 87%                           | 89%                             | 91%                             |
| Rv0423    | 100%                    | 94%                           | 95%                             | 97%                             |
| Rv0440    | 100%                    | 96%                           | 96%                             | 99%                             |
| Rv0467    | 100%                    | 32%                           | 96%                             | 96%                             |
| Rv0468    | 100%                    | 94%                           | 95%                             | 95%                             |
| Rv0470    | 100%                    | 91%                           | 93%                             | 93%                             |
| Rv0501    | 100%                    | 82%                           | 91%                             | 90%                             |
| Rv0640    | 100%                    | 94%                           | 99%                             | 96%                             |
| Rv0642    | 100%                    | 94%                           | 94%                             | 95%                             |
| Rv0645    | 100%                    | 93%                           | 84%                             | 94%                             |
| Rv0824    | 100%                    | 90%                           | 97%                             | 93%                             |
| Rv0826    | 100%                    | 11%                           | 91%                             | 91%                             |
| Rv0867    | 100%                    | 29%                           | 38%                             | 38%                             |
| Rv0991    | 100%                    | 55%                           | 54%                             | 53%                             |
| Rv1009    | 99%                     | 86%                           | 91%                             | 91%                             |
| Rv1038    | 100%                    | 76%                           | 97%                             | 98%                             |
| Rv1131    | 100%                    | 48%                           | 82%                             | 80%                             |
| Rv1221    | 100%                    | 84%                           | 85%                             | 87%                             |
| Rv1284    | 100%                    | 7%                            | 93%                             | 94%                             |
| Rv1390    | 100%                    | 95%                           | 95%                             | 91%                             |
| Rv1479    | 100%                    | 94%                           | 93%                             | 93%                             |
| Rv1733    | 100%                    | 7%                            | 18%                             | 49%                             |
| Rv1737    | 100%                    | 5%                            | 29%                             | 86%                             |
| Rv1738    | 100%                    | 15%                           | 69%                             | 64%                             |
| Rv1791    | 100%                    | 51%                           | 76%                             | 85%                             |
| Rv1792    | 77%                     | Nssf                          | 75%                             | 75%                             |
| Rv1846    | 99%                     | 86%                           | 91%                             | 91%                             |
| Rv1872    | 100%                    | 91%                           | 92%                             | 93%                             |
| Rv1980    | 100%                    | 5%                            | 82%                             | 83%                             |
| Rv2007    | 100%                    | 62%                           | 67%                             | 80%                             |
| Rv2029    | 100%                    | 10%                           | 5%                              | 78%                             |
| Rv2031    | 100%                    | 28%                           | 85%                             | 89%                             |
| Rv2032    | 100%                    | 10%                           | 68%                             | 71%                             |
| Rv2034    | 100%                    | 13%                           | 52%                             | 86%                             |
| Rv2215    | 98%                     | 84%                           | 85%                             | 86%                             |
| Rv2245    | 43%                     | 41%                           | 97%                             | 97%                             |
| Rv2346    | 98%                     | 76%                           | 98%                             | 97%                             |
| Rv2347    | 100%                    | 74%                           | 97%                             | 98%                             |
| Rv2382    | 55%                     | 54%                           | 52%                             | 79%                             |
| Rv2389    | 100%                    | 51%                           | 49%                             | 62%                             |
| Rv2431    | 100%                    | 46%                           | 53%                             | 49%                             |
| Rv2450    | 100%                    | 35%                           | 74%                             | 83%                             |
| Rv2461    | 100%                    | 97%                           | 98%                             | 97%                             |
| Rv2626    | 100%                    | 16%                           | 40%                             | 92%                             |
| Rv2710    | 100%                    | 96%                           | 96%                             | 97%                             |
| Rv2873    | 100%                    | 18%                           | 18%                             | 84%                             |
| Rv2941    | 56%                     | 55%                           | 56%                             | 89%                             |
| Rv3048    | 100%                    | 97%                           | 98%                             | 98%                             |
| Rv3052    | 100%                    | 80%                           | 91%                             | 92%                             |
| Rv3353    | 100%                    | 13%                           | 78%                             | 80%                             |
| Rv3407    | 100%                    | 5%                            | 18%                             | 91%                             |
| Rv3462    | 100%                    | 100%                          | 100%                            | 100%                            |
| Rv3583    | 99%                     | 99%                           | 100%                            | 100%                            |
| Rv3614    | 100%                    | 82%                           | 48%                             | 71%                             |
| Rv3615    | 100%                    | 68%                           | 46%                             | 75%                             |
| Rv3616    | 99%                     | 77%                           | 44%                             | 73%                             |
| Rv3846    | 100%                    | 88%                           | 96%                             | 99%                             |
| Rv3865    | 100%                    | 41%                           | 54%                             | 89%                             |

Nssf: no significant similarity found

**Table S4. IVE-TB proteins selected combining data from in vivo and in silico analyses.**

| Subgroup | Criteria                                                     | List | Rv number      | Expression rank (median RGCN) | Function                       | SNP non syn/protein length | n of alleles covered |    |            | DQ DP |
|----------|--------------------------------------------------------------|------|----------------|-------------------------------|--------------------------------|----------------------------|----------------------|----|------------|-------|
|          |                                                              |      |                |                               |                                |                            | HLAIIa               | DR | >20 (sum)* |       |
| I        | Top 15% upregulated genes in last 6 wks <i>Mtb</i> infection | 1    | Rv2031         | 1 (157842,80)                 | HspX                           | 99                         | 9                    | 16 | 25         | 12    |
|          |                                                              | 2    | <b>Rv3462</b>  | 2 (102738,05)                 | IF-1 infA                      | 100                        | 8                    | 16 | 24         | 9     |
|          |                                                              | 3    | Rv1738         | 4 (77767,70)                  | Conserved hypothetical protein | 99                         | 8                    | 17 | 25         | 8     |
|          |                                                              | 4    | <b>Rv3616</b>  | 5 (75799,22)                  | EspA                           | 98                         | 12                   | 17 | 29         | 12    |
|          |                                                              | 5    | Rv3875         | 6 (69424,68)                  | ESAT6                          | 99                         | 6                    | 13 | 19         | 6     |
|          |                                                              | 6    | Rv3615         | 7 (68193,65)                  | EspC                           | 98                         | 10                   | 16 | 26         | 9     |
|          |                                                              | 7    | <b>Rv0991</b>  | 8 (63946,90)                  | Conserved serine rich protein  | 100                        | 10                   | 17 | 27         | 11    |
|          |                                                              | 8    | <b>Rv1221</b>  | 9 (58858,66)                  | SigE                           | 98                         | 12                   | 17 | 29         | 11    |
|          |                                                              | 9    | Rv2007         | 10 (39200,24)                 | FdxA                           | 99                         | 7                    | 17 | 24         | 12    |
|          |                                                              | 10   | Rv2626         | 11 (38944,48)                 | Hrp1                           | 99                         | 12                   | 17 | 29         | 11    |
|          |                                                              | 11   | <b>Rv2382</b>  | 12 (37458,35)                 | Polyketide synthetase mbtC     | 100                        | 12                   | 17 | 29         | 11    |
|          |                                                              | 12   | Rv1284         | 13 (36325,39)                 | Beta-carbonic anhydrase        | 99                         | 11                   | 17 | 28         | 10    |
|          |                                                              | 13   | <b>Rv2710</b>  | 14 (34396,10)                 | SigB                           | 100                        | 12                   | 17 | 29         | 12    |
|          |                                                              | 14   | <b>Rv3846</b>  | 15 (32097,29)                 | SodA                           | 98                         | 12                   | 17 | 29         | 12    |
|          |                                                              | 15   | Rv0287         | 17 (26911,24)                 | EsxG                           | 99                         | 10                   | 17 | 27         | 9     |
|          |                                                              | 16   | Rv0288         | 18 (25482,65)                 | EsxH                           | 94                         | 10                   | 17 | 27         | 12    |
|          |                                                              | 17   | <b>Rv3052</b>  | 19 (23525,29)                 | FadB4                          | 100                        | 12                   | 17 | 29         | 9     |
|          |                                                              | 18   | Rv1038c        | 22 (20241,80)                 | EsxJ                           | 99                         | 9                    | 17 | 26         | 10    |
|          |                                                              | 19   | Rv1792         | 26 (18245,72)                 | EsxM                           | 100                        | 9                    | 17 | 26         | 10    |
|          |                                                              | 20   | <b>Rv2941</b>  | 27 (16590,25)                 | 28                             | 99                         | 12                   | 17 | 29         | 12    |
|          |                                                              | 21   | <b>Rv3865</b>  | 28 (16585,78)                 | EspF                           | 97                         | 12                   | 17 | 29         | 9     |
|          |                                                              | 22   | <b>Rv0824c</b> | 29 (16455,57)                 | Acyl-desaturase DesA1          | 99                         | 12                   | 17 | 29         | 12    |

| Subgroup | Criteria          | List | Rv number      | Expression rank (median RGCN) | Function                            | SNP non syn/protein length | n of alleles covered |    |            | DQ DP |
|----------|-------------------|------|----------------|-------------------------------|-------------------------------------|----------------------------|----------------------|----|------------|-------|
|          |                   |      |                |                               |                                     |                            | HLAIIa               | DR | >20 (sum)* |       |
| II       | Wide HLA coverage | 23   | <b>Rv1131</b>  | 39 (13339,33)                 | PrpC                                | 98                         | 12                   | 17 | 29         | 12    |
|          |                   | 24   | <b>Rv0423c</b> | 51 (10506,68)                 | ThiC                                | 99                         | 12                   | 17 | 29         | 12    |
|          |                   | 25   | <b>Rv0467</b>  | 58 (9919,47)                  | icl1                                | 100                        | 12                   | 17 | 29         | 12    |
|          |                   | 26   | <b>Rv0642c</b> | 59 (9805,62)                  | MmaA4                               | 99                         | 12                   | 17 | 29         | 12    |
|          |                   | 27   | <b>Rv0826</b>  | 137 (3223,96)                 | Conserved hypothetical protein      | 98                         | 12                   | 17 | 29         | 12    |
|          |                   | 28   | <b>Rv2245</b>  | 56 (10230,41)                 | KasA                                | 98                         | 12                   | 17 | 29         | 11    |
|          |                   | 29   | Rv1980c        | 54 (10289,25)                 | Mpt64                               | 99                         | 12                   | 17 | 29         | 10    |
|          |                   | 30   | <b>Rv0383c</b> | 38 (13406,05)                 | Possible conserved secreted protein | 99                         | 11                   | 17 | 28         | 12    |
|          |                   | 31   | Rv0440         | 45 (10783,72)                 | GroEL2                              | 100                        | 11                   | 17 | 28         | 12    |
|          |                   | 32   | Rv2873         | 53 (10342,89)                 | Mpt83                               | 99                         | 11                   | 17 | 28         | 11    |
|          |                   | 33   | <b>Rv3583c</b> | 52 (10373,84)                 | Possible transcription factor       | 100                        | 10                   | 17 | 27         | 11    |
|          |                   | 34   | Rv2347c        | 40 (12891,82)                 | EspP                                | 100                        | 9                    | 17 | 26         | 10    |
|          |                   | 35   | Rv3407         | 44 (10870,06)                 | VapB47                              | 99                         | 9                    | 16 | 25         | 9     |
|          |                   | 36   | Rv1791         | 47 (10763,19)                 | PE19                                | 100                        | 9                    | 15 | 24         | 10    |
|          |                   | 37   | Rv2346c        | 48 (10718,72)                 | EsxO                                | 99                         | 7                    | 16 | 23         | 10    |

| Subgroup | Criteria           | List          | Rv number      | NB/len Rank | Number of Binders (NB) | Length (len) | NB/len | Function    |
|----------|--------------------|---------------|----------------|-------------|------------------------|--------------|--------|-------------|
| II       | Top binders HLAIIa | 38            | <b>Rv3048c</b> | 12          | 105                    | 324          | 0,3    | RIF protein |
|          |                    | 39            | <b>Rv2431c</b> | 14          | 31                     | 99           | 0,3    | PE25        |
|          |                    | 40            | <b>Rv2461</b>  | 15          | 62                     | 200          | 0,3    | ClpP1       |
|          |                    | 23            | <b>Rv1131</b>  | 18          | 121                    | 393          | 0,3    | PrpC        |
|          |                    | 41            | <b>Rv0645</b>  | 10          | 2479                   | 286          | 8,7    | MmaA1       |
|          | 15                 | Rv0287        | 12             | 813         | 97                     | 8,4          | esxG   |             |
|          | 42                 | <b>Rv1479</b> | 14             | 3078        | 377                    | 8,2          | MoxR1  |             |
|          | 40                 | <b>Rv2461</b> | 16             | 1624        | 200                    | 8,1          | ClpP1  |             |

| Subgroup | Criteria | List | Rv number      | BCG (taxid:33892) | <i>M. leprae</i> (taxid:1769) | Function |
|----------|----------|------|----------------|-------------------|-------------------------------|----------|
| III      | Homology | 43   | Rv0468         | 100%              | 94%                           | FadB2    |
|          |          | 44   | <b>Rv0470c</b> | 100%              | 91%                           | PcaA     |
|          |          | 45   | <b>Rv0501</b>  | 100%              | 82%                           | GulE2    |
|          |          | 46   | <b>Rv0640</b>  | 100%              | 94%                           | RpIK     |
|          |          | 47   | <b>Rv1390</b>  | 100%              | 95%                           | RpoZ     |
|          |          | 48   | <b>Rv1846</b>  | 99%               | 86%                           | Blal     |
|          |          | 49   | <b>Rv1872</b>  | 100%              | 91%                           | IldD2    |
|          |          | 50   | <b>Rv2215</b>  | 98%               | 84%                           | DlaT     |

In grey are the Rv number of proteins previously described in the literature as antigens; (sum)\*: sum of predicted number of epitope binders for alleles HLA-IIa and DR.

**Table S5.** *E/C vs. IVE-TB antigens: comparison of the median cytokine fold-change of stimulated vs. unstimulated samples.*

|           | IFN- $\gamma$ | IP-10 | TNF- $\alpha$ | IL-17 | IL-13 | GM-CSF |
|-----------|---------------|-------|---------------|-------|-------|--------|
| Rv2382    |               |       |               |       |       |        |
| Rv2431    |               |       |               |       |       |        |
| Rv3407    |               |       |               |       |       |        |
| Rv3846    |               |       |               |       |       |        |
| Rv2245    |               |       |               |       |       |        |
| Rv0066    |               |       |               |       |       |        |
| Rv0383    |               |       |               |       |       |        |
| Rv0824    |               |       |               |       |       |        |
| Rv2710    |               |       |               |       |       |        |
| Rv3583    |               |       |               |       |       |        |
| Rv0501    |               |       |               |       |       |        |
| Rv1479    |               |       |               |       |       |        |
| Rv2031    |               |       |               |       |       |        |
| Rv1038    |               |       |               |       |       |        |
| Rv3462    |               |       |               |       |       |        |
| E/C       |               |       |               |       |       |        |
| Rv2007    |               |       |               |       |       |        |
| Rv3052    |               |       |               |       |       |        |
| Rv2941    |               |       |               |       |       |        |
| Rv2215    |               |       |               |       |       |        |
| Rv2873    |               |       |               |       |       |        |
| Rv1738    |               |       |               |       |       |        |
| Rv3048    |               |       |               |       |       |        |
| Rv1792    |               |       |               |       |       |        |
| Rv1390    |               |       |               |       |       |        |
| Rv2346/47 |               |       |               |       |       |        |
| Rv3614/15 |               |       |               |       |       |        |
| Rv2626    |               |       |               |       |       |        |
| Rv3615    |               |       |               |       |       |        |
| Rv2657    |               |       |               |       |       |        |
| Rv0640    |               |       |               |       |       |        |
| Rv0287/88 |               |       |               |       |       |        |
| Rv0423    |               |       |               |       |       |        |
| Rv1284    |               |       |               |       |       |        |
| Rv0467    |               |       |               |       |       |        |
| Rv0642    |               |       |               |       |       |        |
| Rv1872    |               |       |               |       |       |        |
| Rv0468    |               |       |               |       |       |        |
| Rv0826    |               |       |               |       |       |        |
| Rv0440    |               |       |               |       |       |        |
| Rv1980    |               |       |               |       |       |        |
| Rv0645    |               |       |               |       |       |        |
| Rv3616    |               |       |               |       |       |        |
| Rv1846    |               |       |               |       |       |        |
| Rv1791    |               |       |               |       |       |        |
| Rv0991    |               |       |               |       |       |        |
| Rv2461    |               |       |               |       |       |        |
| Rv0470    |               |       |               |       |       |        |
| Rv1221    |               |       |               |       |       |        |
| Rv1131    |               |       |               |       |       |        |
| Rv3865    |               |       |               |       |       |        |
| PPD       |               |       |               |       |       |        |
| PHA       |               |       |               |       |       |        |

Results based on multiplex assay performed with the supernatant of *Mtb*-exposed individuals ( $n = 12$ ). Fold change similar to (●), greater than (■), or less than (□) that induced by E/C; (■): positive controls. E/C: ESAT6/CFP10.
